# Supplementary material
Source: PubMed Central journal article supplement (PMC11188575)
Supplement: NIHMS1990396-supplement-Fig_S2.pdf [file NIHMS1990396-supplement-Fig_S2.pdf]

*Dxl* region

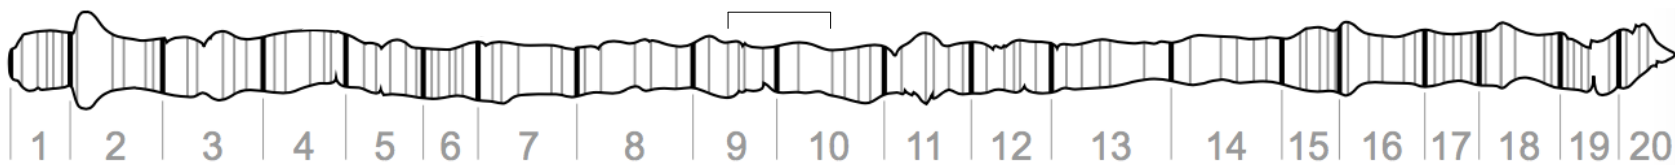

**Homology Key**

|                                                               |                                                       |
|---------------------------------------------------------------|-------------------------------------------------------|
| <span style="color: green;">█</span> CG8664                   | <span style="color: red;">█</span> <i>DINE-1</i>      |
| <span style="color: blue;">█</span> <i>ProtA/B</i> non-coding | <span style="color: pink;">█</span> <i>ninja-like</i> |
| <span style="color: cyan;">█</span> <i>ProtA/B</i> coding     | <span style="color: yellow;">█</span> TE (various)    |
| <span style="color: purple;">█</span> <i>tapas</i>            |                                                       |
| <span style="color: purple;">▨</span> <i>krimper</i>          |                                                       |

1kb

*D. simulans* clade-specific insertions

X:1728401-17283308

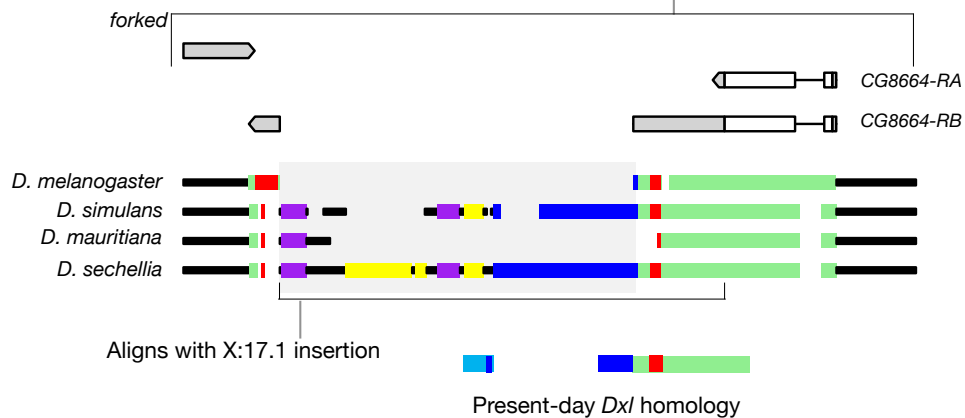

X:17105000-17108372

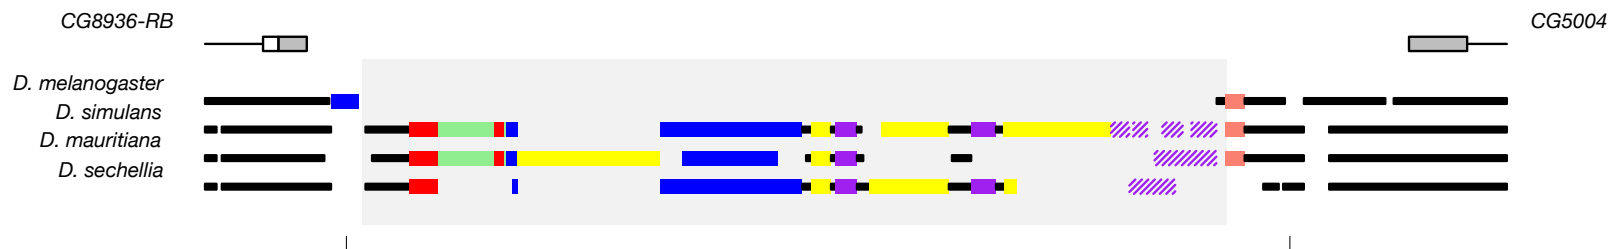

~4.3kb segment, tandemly duplicated 9x in *D. sechellia*
