# Supplementary material
Source: PubMed Central journal article supplement (PMC11188575)
Supplement: NIHMS1990396-supplement-Table_S1.pdf [file NIHMS1990396-supplement-Table_S1.pdf]

**Table S1. Gene-specific evidence for *Dxl*-related expression in testes**

| Species              | Gene/location            | Expressed?  | Evidence             |
|----------------------|--------------------------|-------------|----------------------|
| <i>D. simulans</i>   | <b><i>MDox</i></b>       | Y           | SNP                  |
| <i>D. simulans</i>   | <b><i>Dox</i></b>        | Y           | SNP                  |
| <i>D. simulans</i>   | <b><i>Dxl-2</i></b>      | Y           | SNP                  |
| <i>D. simulans</i>   | <b><i>Ur-Dox</i></b>     | Y           | SNP                  |
| <i>D. simulans</i>   | <b><i>Dxl-1a</i></b>     | Y           | SNP                  |
| <i>D. simulans</i>   | <b><i>Dxl-1b</i></b>     | no evidence |                      |
| <i>D. simulans</i>   | <b><i>Nmy</i></b>        | Y           | SNP                  |
| <i>D. simulans</i>   | <b><i>Tmy</i></b>        | Y           | SNP                  |
| <i>D. simulans</i>   | <b><i>X:17.1</i></b>     | Y           | SNP                  |
| <i>D. simulans</i>   | <b><i>X:17.2</i></b>     | Y           | SNP                  |
| <i>D. mauritiana</i> | <b><i>MDox</i></b>       | Y           | SNP                  |
| <i>D. mauritiana</i> | <b><i>Dxl-14</i></b>     | no evidence |                      |
| <i>D. mauritiana</i> | <b><i>Dxl-12</i></b>     | no evidence |                      |
| <i>D. mauritiana</i> | <b><i>Dxl-11</i></b>     | Y           | SNP, splice junction |
| <i>D. mauritiana</i> | <b><i>Dxl-10</i></b>     | no evidence |                      |
| <i>D. mauritiana</i> | <b><i>Dxl-9</i></b>      | Y           | splice junction      |
| <i>D. mauritiana</i> | <b><i>Dxl-8</i></b>      | Y           | splice junction      |
| <i>D. mauritiana</i> | <b><i>Dxl-5</i></b>      | Y           | splice junction      |
| <i>D. mauritiana</i> | <b><i>Dxl-4</i></b>      | Y           | SNP, splice junction |
| <i>D. mauritiana</i> | <b><i>Dxl-3</i></b>      | Y           | SNP, splice junction |
| <i>D. mauritiana</i> | <b><i>Dxl-1</i></b>      | no evidence |                      |
| <i>D. mauritiana</i> | <b><i>Ur-Dox</i></b>     | no evidence |                      |
| <i>D. mauritiana</i> | <b><i>Nmy</i></b>        | no evidence |                      |
| <i>D. mauritiana</i> | <b><i>Tmyl_left</i></b>  | Y           | segment              |
| <i>D. mauritiana</i> | <b><i>Tmyl_right</i></b> | Y           | SNP                  |
| <i>D. mauritiana</i> | <b><i>X:17.1</i></b>     | no evidence |                      |
| <i>D. mauritiana</i> | <b><i>X:17.2</i></b>     | no evidence |                      |
| <i>D. sechellia</i>  | <b><i>Dxl-15</i></b>     | Y           | SNP                  |
| <i>D. sechellia</i>  | <b><i>Dxl-14</i></b>     | Y           | SNP                  |
| <i>D. sechellia</i>  | <b><i>Dxl-13</i></b>     | Y           | SNP, splice junction |
| <i>D. sechellia</i>  | <b><i>Dxl-12</i></b>     | Y           | splice junction      |
| <i>D. sechellia</i>  | <b><i>Dxl-11</i></b>     | Y           | splice junction      |
| <i>D. sechellia</i>  | <b><i>Dxl-10</i></b>     | no evidence |                      |
| <i>D. sechellia</i>  | <b><i>Dxl-9</i></b>      | Y           | segment              |
| <i>D. sechellia</i>  | <b><i>Dxl-7</i></b>      | Y           | SNP                  |
| <i>D. sechellia</i>  | <b><i>Dxl-6</i></b>      | no evidence |                      |
| <i>D. sechellia</i>  | <b><i>Dxl-4</i></b>      | no evidence |                      |
| <i>D. sechellia</i>  | <b><i>Dx1a</i></b>       | no evidence |                      |
| <i>D. sechellia</i>  | <b><i>Dxl-1b</i></b>     | no evidence |                      |
| <i>D. sechellia</i>  | <b><i>Ur_Dox_a</i></b>   | Y           | SNP                  |
| <i>D. sechellia</i>  | <b><i>Ur_Dox_b</i></b>   | no evidence |                      |
| <i>D. sechellia</i>  | <b><i>Tmyl_left</i></b>  | Y           | SNP                  |
| <i>D. sechellia</i>  | <b><i>Tmyl_right</i></b> | Y           | segment              |
| <i>D. sechellia</i>  | <b><i>Emy_1</i></b>      | Y           | SNP                  |
| <i>D. sechellia</i>  | <b><i>Emy_2</i></b>      | Y           | SNP                  |
| <i>D. sechellia</i>  | <b><i>X:17.1</i></b>     | Y           | SNP                  |
| <i>D. sechellia</i>  | <b><i>X:17.2</i></b>     | Y           | SNP                  |
