# Supplementary material
Source: PubMed Central journal article supplement (PMC11188575)
Supplement: NIHMS1990396-supplement-Table_S2.pdf [file NIHMS1990396-supplement-Table_S2.pdf]

**Table S2. Dxl expression in testes, males, females, and early-stage embryos in *D. simulans*, *D. mauritiana*, and *D. sechellia***

|                      | Replicate | SRR         | Dxl_consensus | Act5C<br>FBtr0210252 | protamine<br>FBtr0221891 | CG13131<br>FBtr0222221 |
|----------------------|-----------|-------------|---------------|----------------------|--------------------------|------------------------|
| <i>D. simulans</i>   |           |             |               |                      |                          |                        |
| Testes               | 1         | SRR14777836 | 52.41         | 587.83               | 2054.15                  | 67.62                  |
| Testes               | 2         | SRR14777837 | 49.76         | 554.07               | 2066.17                  | 56.22                  |
| Males                | 1         | SRR9025061  | 18.37         | 138.42               | 507.73                   | 9.98                   |
| Males                | 2         | SRR9025062  | 21.64         | 114.75               | 482.26                   | 1.73                   |
| Males                | 3         | SRR9025063  | 21.76         | 114.02               | 464.43                   | 1.97                   |
| Females              | 1         | SRR9025064  | 0.21          | 260.41               | 0.10                     | 0.00                   |
| Females              | 2         | SRR9025057  | 0.27          | 254.88               | 0.00                     | 0.02                   |
| Females              | 3         | SRR9025058  | 0.35          | 265.46               | 0.00                     | 0.00                   |
| Embryo (stage 2)     | 1         | SRR6968152  | 0.07          | 355.43               | 0.00                     | 0.00                   |
| Embryo (stage 2)     | 2         | SRR6968153  | 0.00          | 357.98               | 0.00                     | 0.02                   |
| Embryo (stage 2)     | 3         | SRR6968154  | 0.00          | 329.82               | 0.00                     | 0.00                   |
| Embryo (stage 5)     | 1         | SRR6968155  | 0.09          | 811.52               | 0.00                     | 0.00                   |
| Embryo (stage 5)     | 2         | SRR6968156  | 0.11          | 760.40               | 0.00                     | 0.00                   |
| Embryo (stage 5)     | 3         | SRR6968157  | 0.04          | 742.14               | 0.00                     | 0.00                   |
| <i>D. mauritiana</i> |           |             |               |                      |                          |                        |
| Testes               | 1         | SRR9025052  | 34.67         | 301.64               | 1777.50                  | 13.57                  |
| Testes               | 2         | SRR9025053  | 31.85         | 454.18               | 1519.54                  | 15.62                  |
| Testes               | 3         | SRR9025054  | 25.08         | 479.53               | 1237.63                  | 17.13                  |
| Males                | 1         | SRR9025056  | 8.54          | 92.40                | 189.72                   | 1.44                   |
| Males                | 2         | SRR9025047  | 11.84         | 126.59               | 374.75                   | 4.40                   |
| Males                | 3         | SRR9025048  | 14.28         | 99.47                | 359.60                   | 2.13                   |
| Females              | 1         | SRR9025049  | 0.05          | 250.58               | 0.00                     | 0.01                   |
| Females              | 2         | SRR9025050  | 0.22          | 238.80               | 0.08                     | 0.00                   |
| Females              | 3         | SRR9025051  | 0.17          | 256.07               | 0.00                     | 0.00                   |
| Embryo (stage 2)     | 1         | SRR6968106  | 0.15          | 570.73               | 0.00                     | 0.00                   |
| Embryo (stage 2)     | 2         | SRR6968107  | 0.19          | 543.68               | 0.00                     | 0.00                   |
| Embryo (stage 2)     | 3         | SRR6968108  | 0.00          | 493.40               | 0.00                     | 0.00                   |
| Embryo (stage 5)     | 1         | SRR6968109  | 1.15          | 1197.85              | 0.00                     | 0.02                   |
| Embryo (stage 5)     | 2         | SRR6968110  | 1.13          | 1043.66              | 0.00                     | 0.00                   |
| Embryo (stage 5)     | 3         | SRR6968111  | 1.16          | 1144.28              | 0.00                     | 0.00                   |
| <i>D. sechellia</i>  |           |             |               |                      |                          |                        |
| Testes               | 1         | SRR14777834 | 83.02         | 459.12               | 1539.09                  | 388.24                 |
| Testes               | 2         | SRR14777835 | 113.63        | 655.03               | 1955.44                  | 536.85                 |
| Males                | 1         | SRR9025045  | 46.03         | 182.69               | 681.40                   | 125.69                 |
| Females              | 1         | SRR9025046  | 0.96          | 269.26               | 0.08                     | 0.03                   |
| Embryo (stage 2)     | 1         | SRR6968146  | 0.05          | 328.26               | 0.00                     | 0.00                   |
| Embryo (stage 2)     | 2         | SRR6968147  | 0.06          | 394.38               | 0.00                     | 0.00                   |
| Embryo (stage 2)     | 3         | SRR6968148  | 0.04          | 416.36               | 0.00                     | 0.00                   |
| Embryo (stage 5)     | 1         | SRR6968149  | 0.17          | 748.43               | 0.00                     | 0.00                   |
| Embryo (stage 5)     | 2         | SRR6968150  | 0.34          | 801.06               | 0.00                     | 0.00                   |
| Embryo (stage 5)     | 3         | SRR6968151  | 0.21          | 885.21               | 0.00                     | 0.00                   |
