# Supplementary material
Source: PubMed Central journal article supplement (PMC11188575)
Supplement: NIHMS1990396-supplement-Table_S3.pdf [file NIHMS1990396-supplement-Table_S3.pdf]

**Table S3. Average matching percentage of esiRNAs (weighted by esiRNA abundance) to putative target genes for each species.**

| Species              | hpRNA       | Putative Target Genes |               |               |               |               |               |              |              |              |              |               |               |                 |                 |
|----------------------|-------------|-----------------------|---------------|---------------|---------------|---------------|---------------|--------------|--------------|--------------|--------------|---------------|---------------|-----------------|-----------------|
|                      |             | <i>Dox</i>            | <i>Mdox</i>   | <i>Dxl-2</i>  | <i>Dxl-1a</i> | <i>Dxl-1b</i> | <i>Ur-Dox</i> |              |              |              |              |               |               |                 |                 |
| <i>D. simulans</i>   | <i>Tmy</i>  | 0.54                  | 0.51          | 0.92          | 0.94          | 0.00          | 0.11          |              |              |              |              |               |               |                 |                 |
|                      | <i>Nmy</i>  | 0.87                  | 0.93          | 0.75          | 0.75          | NA            | 0.16          |              |              |              |              |               |               |                 |                 |
| <i>D. mauritiana</i> |             | <i>MDox</i>           | <i>Dxl-14</i> | <i>Dxl-12</i> | <i>Dxl-11</i> | <i>Dxl-10</i> | <i>Dxl-9</i>  | <i>Dxl-8</i> | <i>Dxl-5</i> | <i>Dxl-4</i> | <i>Dxl-3</i> | <i>Dxl-1</i>  | <i>Ur-Dox</i> |                 |                 |
|                      | <i>Tmyl</i> | 0.51                  | 0.53          | 0.50          | 0.91          | 0.52          | 0.92          | 0.91         | 0.90         | 0.87         | 0.87         | 0.00          | 0.86          |                 |                 |
|                      | <i>Nmy</i>  | 0.91                  | 0.93          | 0.64          | 0.48          | 0.71          | 0.53          | 0.49         | 0.57         | 0.57         | 0.47         | NA            | 0.47          |                 |                 |
| <i>D. sechellia</i>  |             | <i>Dxl-15</i>         | <i>Dxl-14</i> | <i>Dxl-13</i> | <i>Dxl-12</i> | <i>Dxl-11</i> | <i>Dxl-10</i> | <i>Dxl-9</i> | <i>Dxl-7</i> | <i>Dxl-6</i> | <i>Dxl-4</i> | <i>Dxl-1a</i> | <i>Dxl-1b</i> | <i>Ur-Dox_a</i> | <i>Ur-Dox_b</i> |
|                      | <i>Tmyl</i> | 0.61                  | 0.82          | 0.82          | 0.73          | 0.74          | 0.87          | 0.82         | 0.82         | 0.54         | 0.87         | 0.87          | NA            | 0.87            | 0.09            |
|                      | <i>Emy</i>  | 0.98                  | 0.97          | 0.97          | 0.97          | 0.97          | 0.79          | 0.97         | 0.97         | 0.58         | 0.79         | 0.79          | NA            | 0.79            | NA              |
