# Supplementary material
Source: PubMed Central journal article supplement (PMC11188575)
Supplement: NIHMS1990396-supplement-Table_S4.pdf [file NIHMS1990396-supplement-Table_S4.pdf]

**Table S4. Datasets included in analysis can be found in SRA (<https://www.ncbi.nlm.nih.gov/sra>)**

| <b>Description</b>                          | <b>Accessions</b>                  |
|---------------------------------------------|------------------------------------|
| <i>D. mauritiana</i> PacBio genome assembly | SRR5574088                         |
| <i>D. simulans</i> PacBio genome assembly   | SRR5491305                         |
| <i>D. sechellia</i> PacBio genome assembly  | SRR5514394                         |
| <i>D. mauritiana</i> RNA-seq                | SRR9025052, SRR9025053, SRR9025054 |
| <i>D. simulans</i> RNA-seq                  | SRR14777836, SRR14777837           |
| <i>D. sechellia</i> RNA-seq                 | SRR14777834, SRR14777835           |
| <i>D. mauritiana</i> small RNA-seq          | SRR7961897                         |
| <i>D. simulans</i> small RNA-seq            | SRR410589, SRR410590               |
| <i>D. sechellia</i> small RNA-seq           | SRR6667444                         |
