# Supplementary material
Source: PubMed Central journal article supplement (PMC11188575)

Figure S1

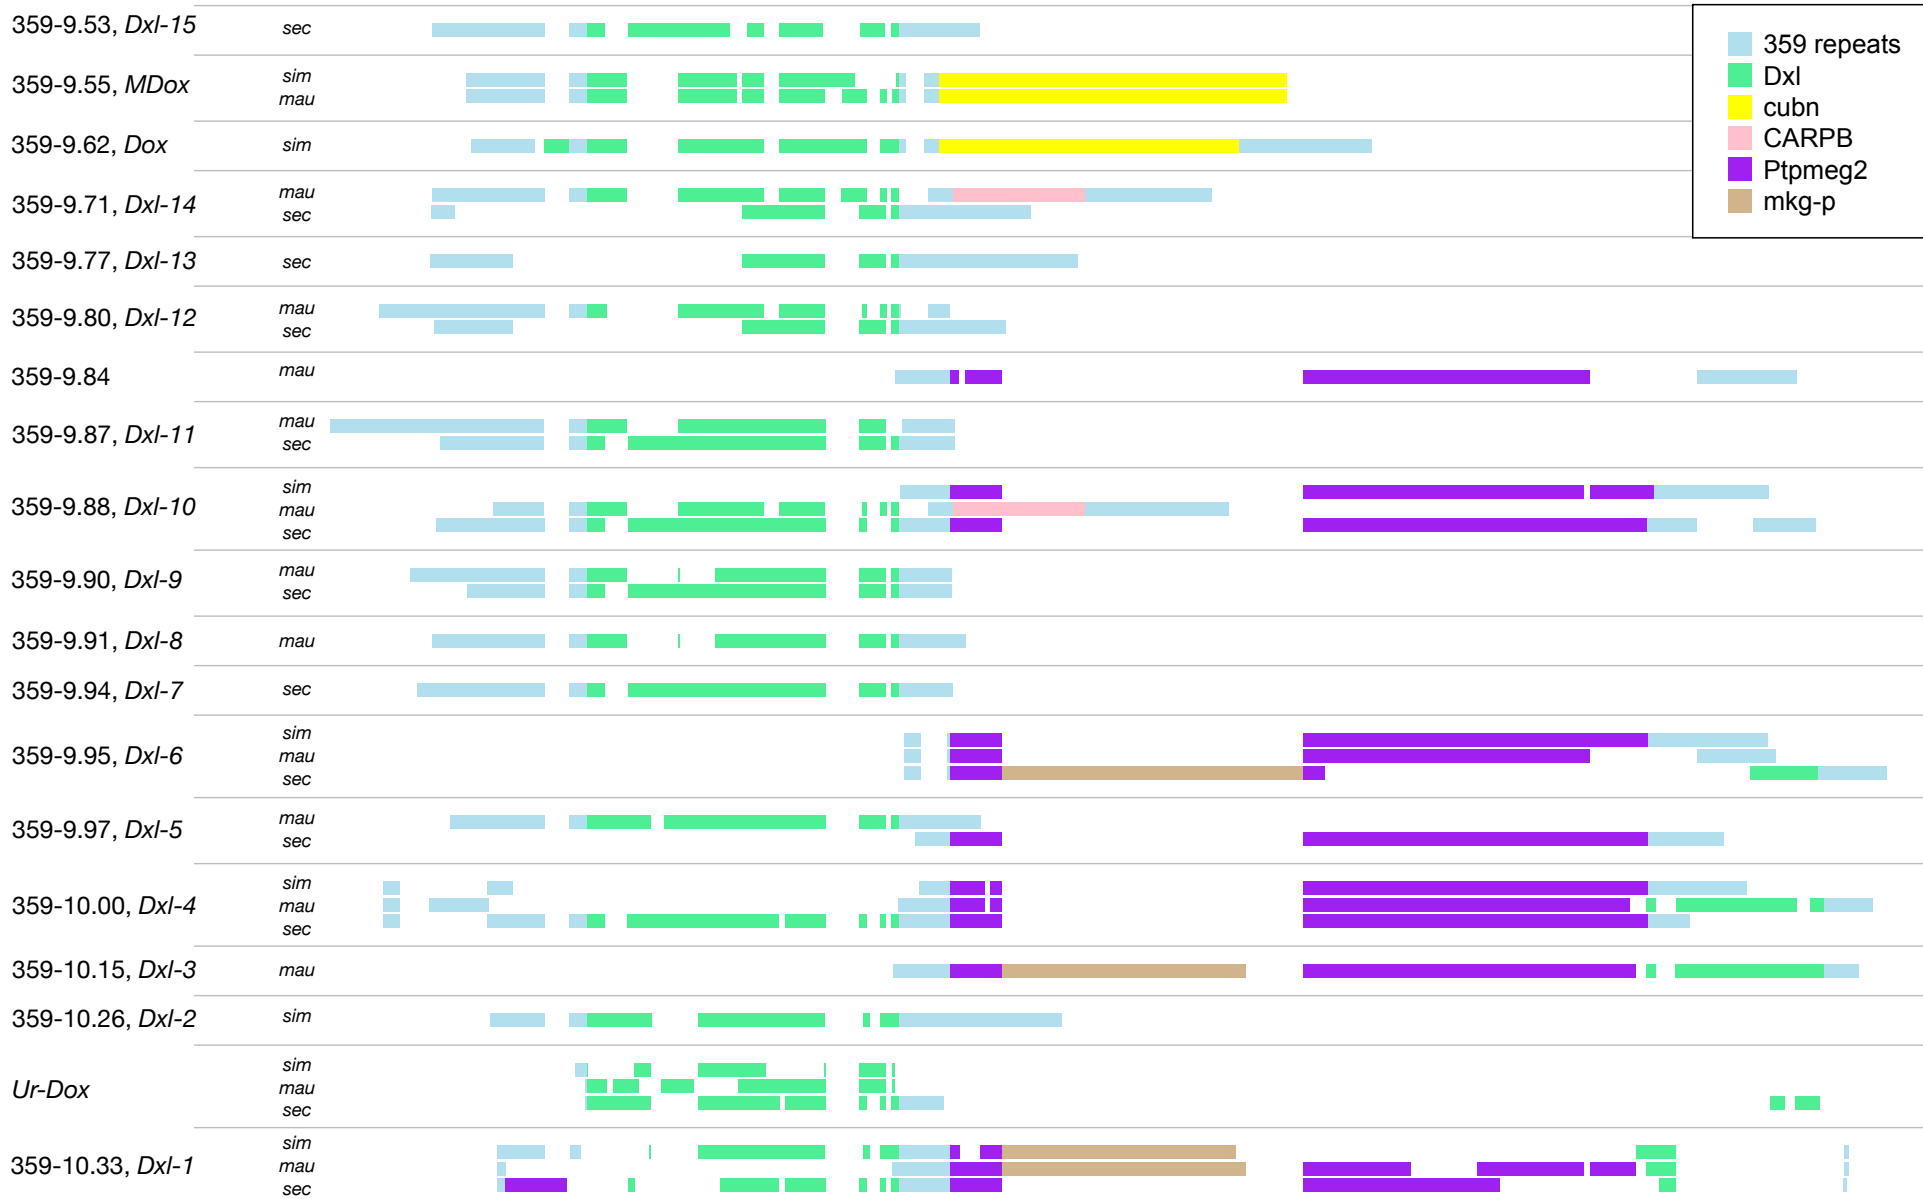

Supplement: NIHMS1990396-supplement-Fig_S1.pdf [file NIHMS1990396-supplement-Fig_S1.pdf]

Figure S3

Dmel X:9450000-10350000

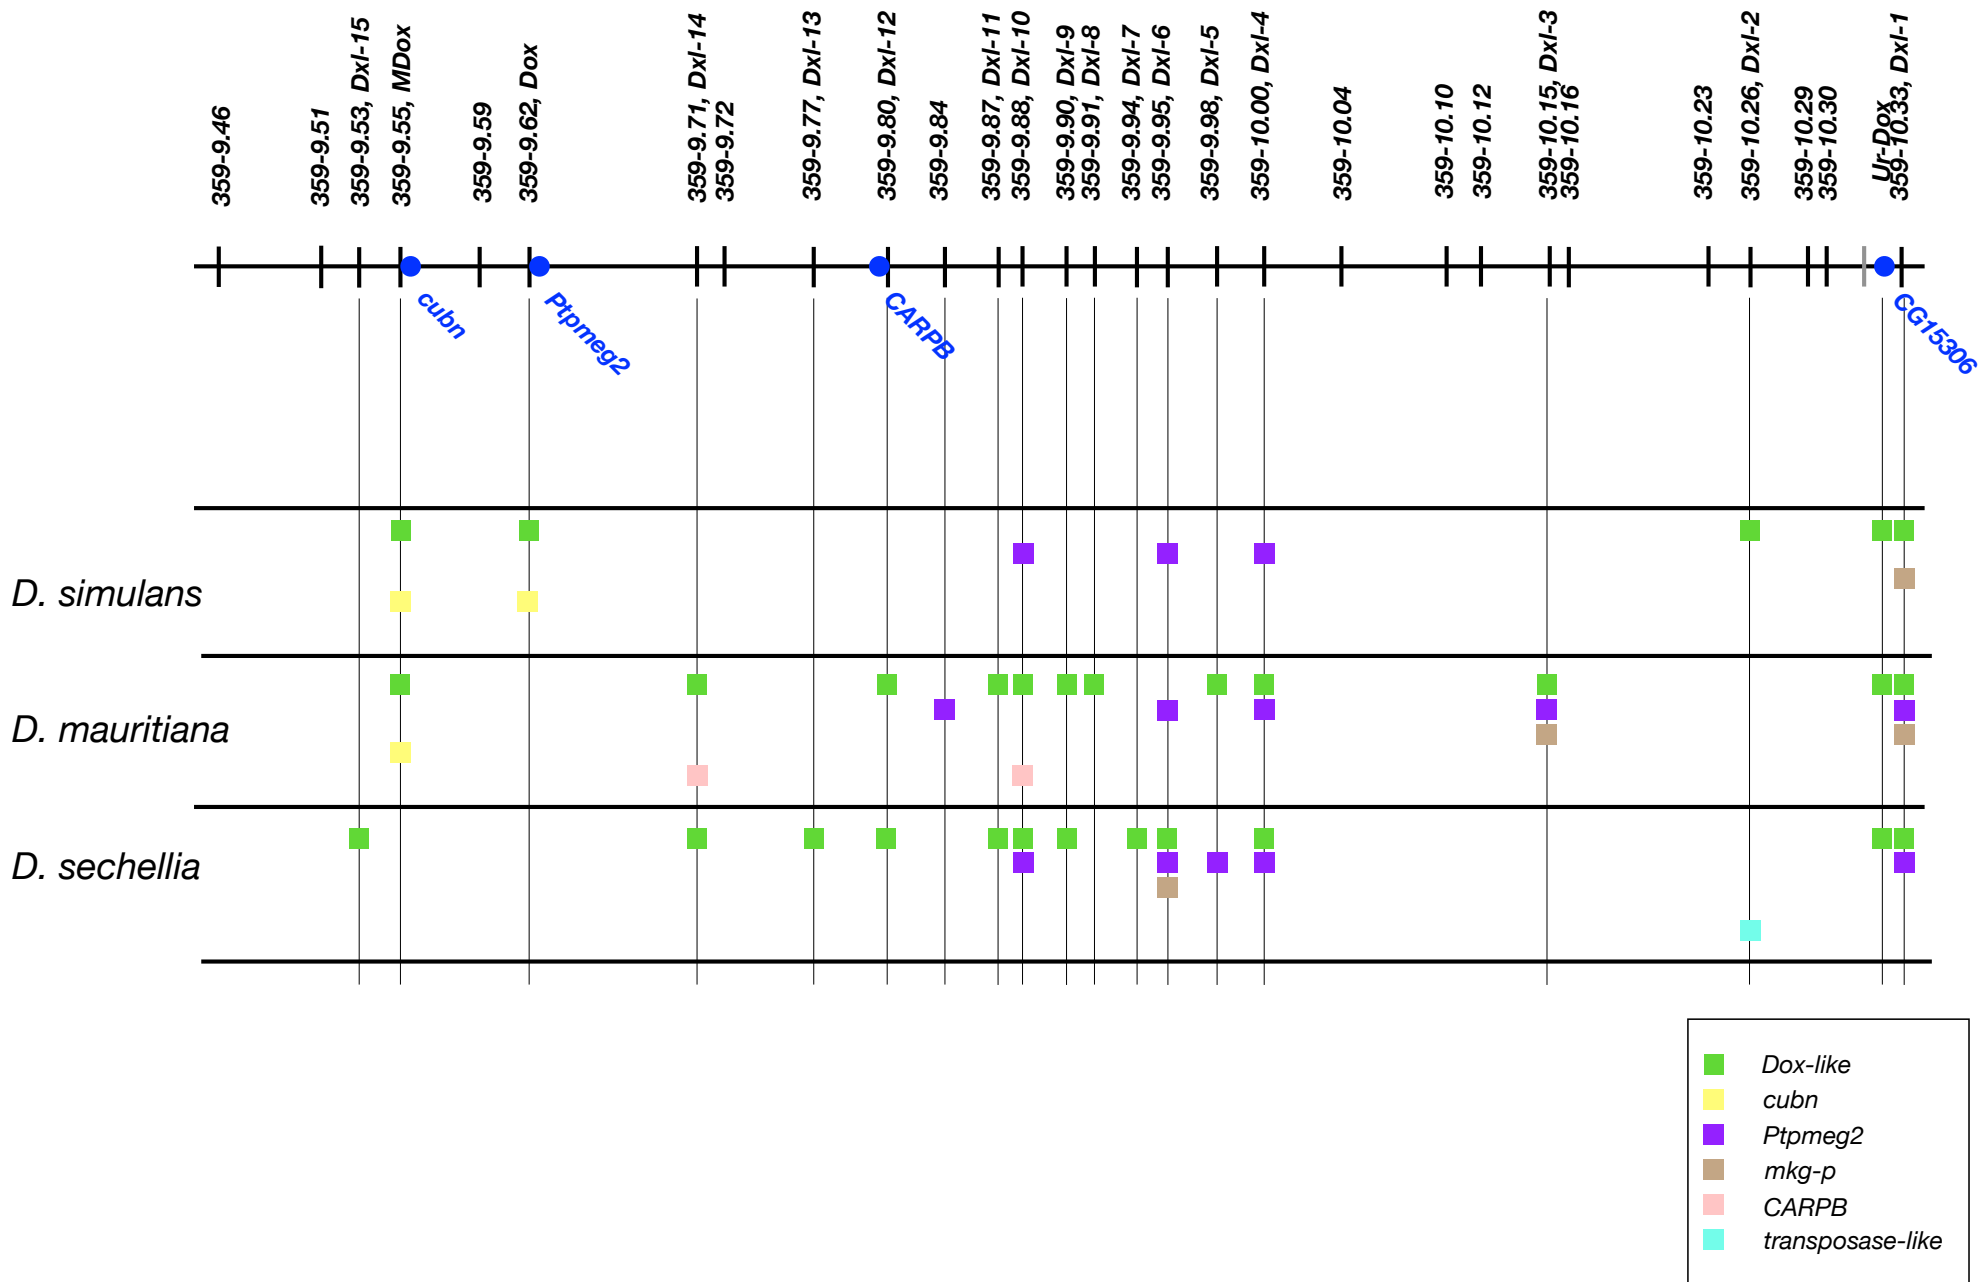

Supplement: NIHMS1990396-supplement-Fig_S3.pdf [file NIHMS1990396-supplement-Fig_S3.pdf]

Figure S4

359-9.80 in *CARPB* intron sequence

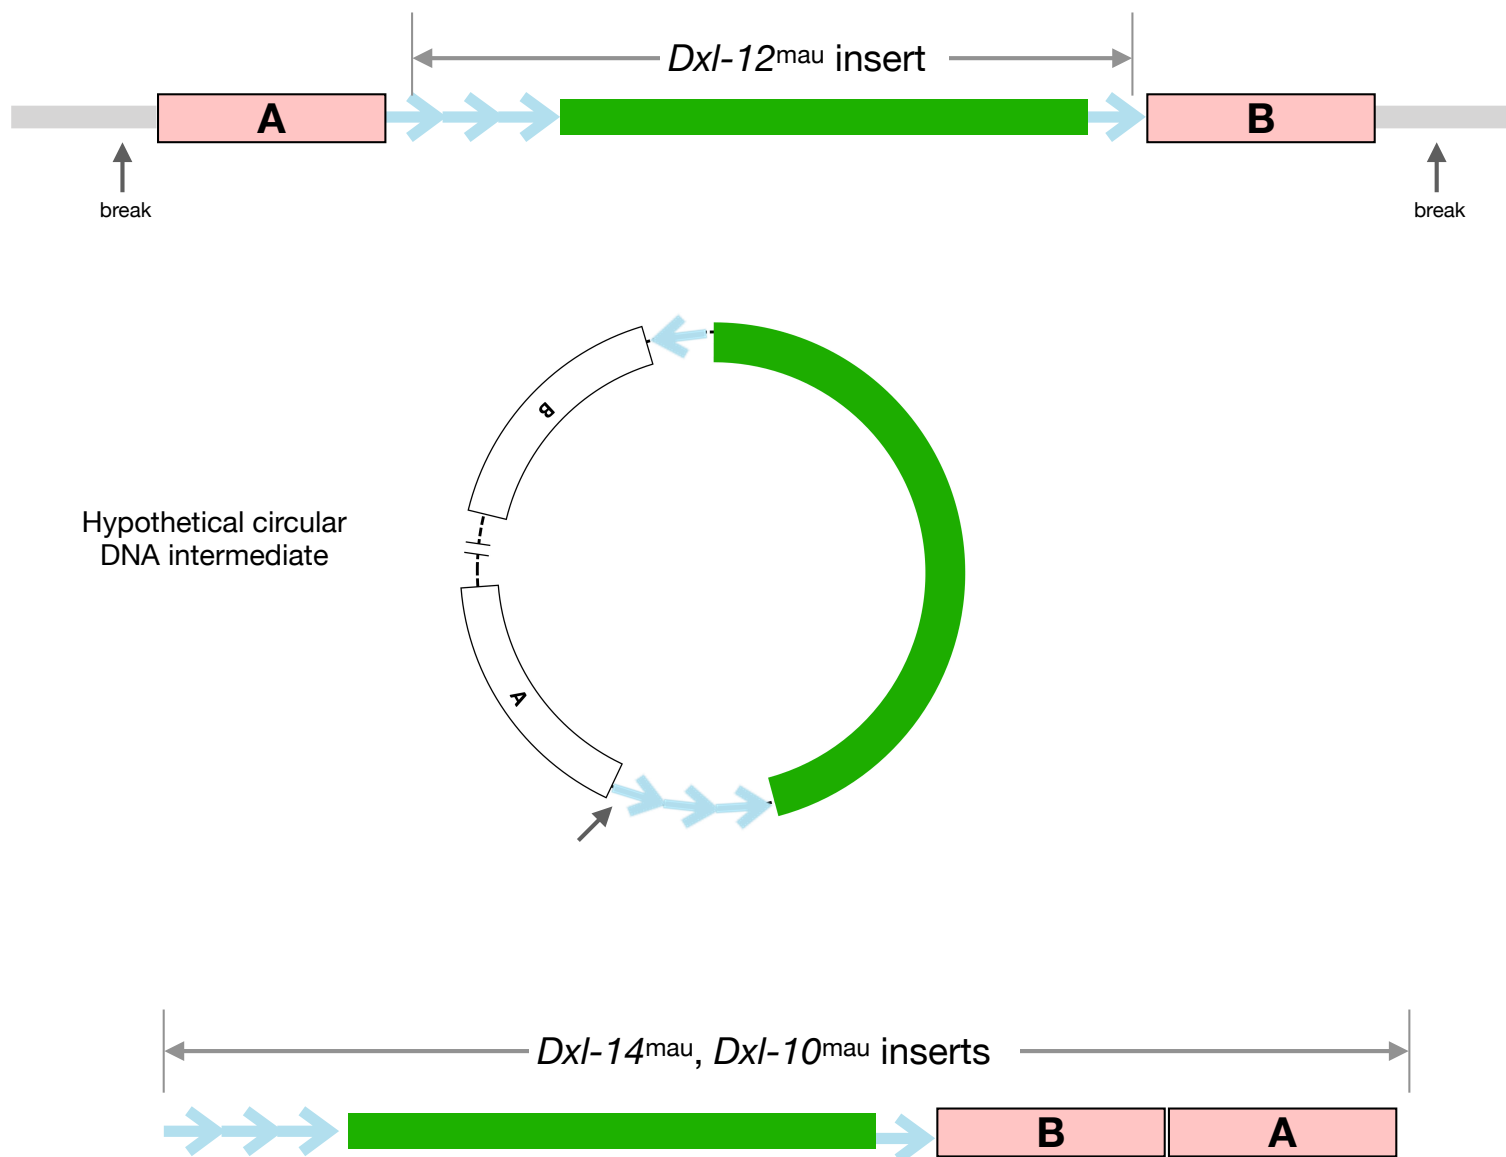

Supplement: NIHMS1990396-supplement-Fig_S4.pdf [file NIHMS1990396-supplement-Fig_S4.pdf]
